# Supplementary material
Source: publisher site journal article supplement (http://www.degruyter.com/publication/journal_key/ISS/downloadAsset/ISS_Information_for_Authors.pdf)
Supplement: Supplementary file 1 [file ISS_Information_for_Authors.pdf]

# INNOVATIVE SURGICAL SCIENCES (ISS)

## THE RAPID JOURNAL OF THE GERMAN SOCIETY of Surgery

# INFORMATION FOR AUTHORS

## SCOPE OF THE JOURNAL

**Innovative Surgical Sciences (ISS)** is an open access, open peer-reviewed journal and welcomes English language Original Articles, Reviews and Case reports covering clinical and experimental studies in all surgical sub-specialties. ISS also publishes Editorials, Letters to the Editor, Guidelines and Recommendations, Perspectives and Congress Abstracts. All contributions submitted for publication are double-blind reviewed by at least two renowned experts in the field, selected and invited by the Editor in Chief. All submissions will be subject to a rapid, initially double blind peer-review process, allowing a first decision to be reached within 30 days of submission. For submissions accepted for publication, the complete reviewer reports, author response letter(s), and decision letter(s) will be published as supplementary material and as part of the article record. When manuscripts are accepted with revision, the revised manuscript should be returned within approx. 6 weeks. Accepted articles are published approx. 3-4 weeks after acceptance.

### Topics

- general surgery
- digestive surgery
- vascular surgery
- pediatric surgery
- oral - maxillofacial surgery
- orthopedic surgery
- clinical and experimental research
- plastic, reconstructive and aesthetic surgery
- neurosurgery
- heart surgery
- trauma surgery
- thoracic surgery

## JOURNAL POLICY

### Ethical conduct of research:

For information on plagiarism, please refer to COPE Committee on Publication Ethics. Please note that **ISS** uses the check program "iThenticate" to assess for potential overlap in prior publication(s). Any previously published material must be referenced appropriately in the manuscript. For every submission to **ISS**, authors have to fill out and upload the [Author Form for Disclosure of Potential Conflict of Interest](#) and the [Template for Ethical and Legal Declarations](#) at the time of the original submission. Further instructions can be found in the [Quick Checklist for Submission](#) and [Quick Checklist for Main Document](#).

### Copyright:

Manuscripts are accepted on condition of transfer of copyright (for U.S. government employees: to the extent transferable) to the publisher. Once the manuscript has been accepted, it may not be published elsewhere without the consent of the copyright holders.

### Note for authors of NIH-funded research:

De Gruyter acknowledges that the author of a US-agency-funded article retains the right to provide a copy of the final manuscript to agency upon acceptance for publication or thereafter, for public archiving in PubMed Central 12 months after publication in **ISS**. Note that only the accepted author's version of the manuscript, not the PDF file of the published article, may be used for NIH archiving.

## SUBMISSION OF MANUSCRIPTS

Detailed information on submission of articles can be found in the [Quick Checklist for Submission](#). Please submit manuscripts exclusively online at: <https://mc.manuscriptcentral.com/iss>

## ARTICLE PROCESSING CHARGES AND WAIVER POLICY

All articles published in **ISS** are fully open access. The Article processing charge is 1.000 EUR. If you are a member of the German Society of Surgery, or you have been acquired as author by a board member of the journal, you will not be asked to pay for your submission – German Society of Surgery will cover the processing charges. Therefore you will be asked about your membership in the German Society of Surgery during the submission of your manuscript.

If the submitting author is affiliated with an organization which is listed as an Institutional Member or work for institutions in developing countries (countries classified by the World Bank as low income and lower-middle-income economies) Article Processing Charges may be waived. Please see for more information: <https://www.degruyter.com/page/open-access-funding>

## GENERAL INFORMATION ON PREPARATION OF MANUSCRIPTS

Detailed information of preparation of manuscripts for **ISS** can be found in the [Quick Checklist for Main Document](#). Strictly adhere to the instructions. **ISS** provides authors with an individual template for every article type (go to 'Supplementary Information' on the [journal website](#)).

### General format and length of the types of articles accepted for submission

|                                | Max. Word count* | Max. Word count in abstract | Number of keywords | Number of Tables & Figures | Number of references |
|--------------------------------|------------------|-----------------------------|--------------------|----------------------------|----------------------|
| Original article               | 6000             | 500, structured             | 3-7                | ≤8                         | ≤35                  |
| Reviews                        | 8000             | 500, unstructured           | 3-7                | ≤8                         | ≤75                  |
| Case Reports                   | 2500             | 200, unstructured           | 3-7                | ≤5                         | ≤10                  |
| Letter to the Editor / Reply   | 1000             | n/a                         | 3-5                | ≤2                         | ≤10                  |
| Editorials                     | 1500             | n/a                         | n/a                | ≤1                         | ≤10                  |
| Congress abstracts             | 2500             | 200; unstructured           | 3-5                | ≤3                         | ≤20                  |
| Guidelines and Recommendations | 6000             | 500, structured             | 3-6                | ≤8                         | ≤60                  |

## POST-ACCEPTANCE

### Proofs:

The Editor-in-Chiefs will inform the Corresponding Author of the manuscript decision. Accepted manuscripts must be provided in a Word document containing the final text for typesetting. The Corresponding Author of an article will receive the galley proofs in electronic form to check for editing and type-setting accuracy and is requested to distribute the proof to the co-authors if applicable. The final, accepted version of the manuscript must adhere to the above guidelines. Please check the final file of the article carefully because spelling mistakes, inconsistencies and errors will be faithfully translated into the typeset version. Major changes to the article after acceptance will not be considered without undergoing additional peer review and will cause extra costs.

### Offprints:

The electronic files of typeset articles in Adobe Acrobat PDF format are provided free of charge; corresponding authors receive an e-mail notification that their article has been published online. They are Paper offprints can be ordered in addition; an offprint order form will accompany the page proofs and should be completed and returned with the corrected proofs immediately if offprints are requested.

### Open Access policy:

It is the aim of the journal to create the future of free digital information to the surgical community worldwide in order to promote surgical and scientific knowledge. Therefore, your manuscript will be published open access after acceptance along with the complete reviewer reports and author response letter(s) will be published as supplementary material and as part of the article record. Please see the section on [Article Processing Charges and Waiver policy](#) above. For more information on De Gruyter's open access policies please check [here](#).

## PLEASE CONTACT THE EDITORIAL OFFICE WITH ANY FURTHER QUESTIONS:

Dr Simone Sporn  
Tel.: +49-30-26005-276  
E-mail: [ISS.editorial@deGruyter.com](mailto:ISS.editorial@deGruyter.com)
